# Supplementary material for: PCR-Stop analysis as a new tool for qPCR assay validation
Source: PubMed Central journal article supplement (PMC5974342; doi:10.1038/s41598-018-26116-x), 2018-05-29
Supplement: 41598_2018_26116_MOESM1_ESM.pdf [file 41598_2018_26116_MOESM1_ESM.pdf]

## Supplementary Information

### PCR-Stop analysis as a new tool for qPCR assay validation

Anna Kristina Witte, Patrick Mester, Susanne Fister, Beate Süß, Martin Wagner and Peter Rossmanith

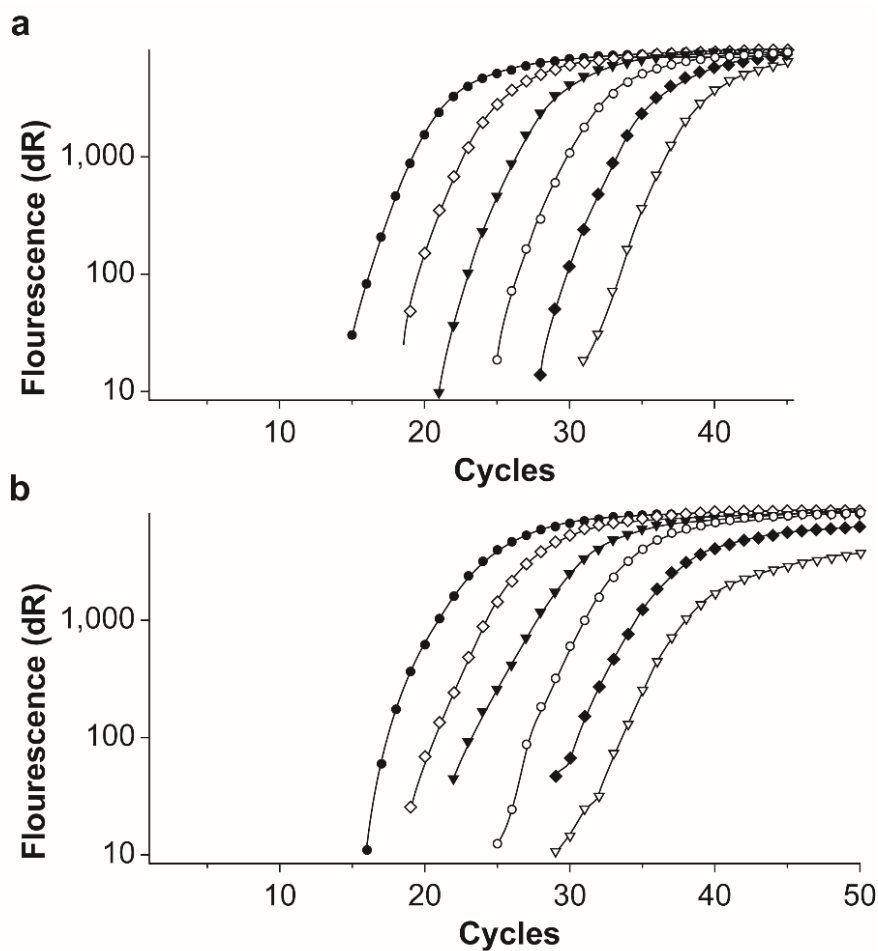

#### Supplemental Fig.S1: Standard curve of the *Listeria monocytogenes prfA* and *Salmonella enterica serovar Thyphimurium exB* assays

Exemplary illustration of the *L. monocytogenes prfA* (a) and *S. enterica exB* qPCR showing a 10-fold serial dilution ranging from  $1.58 \times 10^6$  to 15.8 ITMN with an efficiency of 94.7 % and an  $R_{sq}$  of 1.000 (a) or from  $9.5 \times 10^5$  to 9.5 ITMN with an efficiency of 100.6 % and an  $R_{sq}$  of 0.999 (b), respectively.

**Supplemental Table S2: Poisson analysis of *prfA* and *exB***

|                    |                                        | <b>1 copy</b>   | <b>3 copies</b> | <b>10 copies</b> | <b>Conclusion</b>                     |
|--------------------|----------------------------------------|-----------------|-----------------|------------------|---------------------------------------|
| <b><i>prfA</i></b> | Average copies                         | 0.96            | 3.0             | 10.6             | Congruency ok                         |
|                    | Negative samples %<br>(negative/total) | 43 %<br>(13/30) | 7 %<br>(2/30)   | -                | Fitting to theoretical expectations   |
|                    | Theoretical expectation                | 40 %            | 5 %             | -                |                                       |
| <b><i>exB</i></b>  | Average copies                         | 0.63            | 2.4             | 7.9              | Congruency ok                         |
|                    | Negative samples %<br>(negative/total) | 56 %<br>(17/30) | 30 %<br>(9/30)  | -                | Excess of negative samples (3 copies) |
|                    | Theoretical expectation                | 55 %            | 8 %             | -                |                                       |

One exemplary Poisson experiment of the *prfA* and *exB* are demonstrated showing average copy numbers and (relative and absolute) quantities of negative sample and the respective theoretical expectations. The *exB* assay has in the “3 copies” data set a distinct excess of negative samples leading to probable underquantification in data analysis.
